# Supplementary material for: Novel PAN/PVP Janus ultrafine fiber membrane and its application for biphasic drug release
Source: Royal Society of Chemistry journal article supplement (doi:10.1039/c7tb00929a), 2017-01-01
Supplement: c7tb00929a1.pdf [file c7tb00929a1.pdf]

## Supplementary Information

### Novel PAN/PVP Janus ultrafine fiber membrane and its application for biphasic drug release

Yuting Geng, Pan Zhang, Qiutong Wang, Yangxiu Liu, Kai Pan\*

#### 1. TEM images

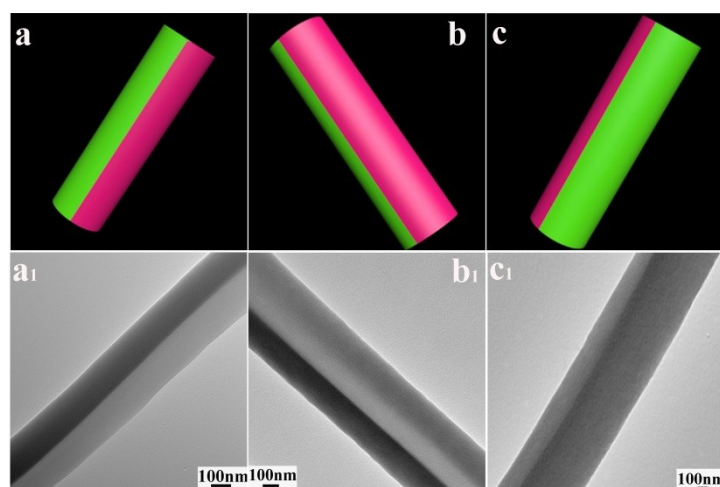

**Fig. S1.** (a)-(c):structural schematic diagram of PAN/PVP Janus ultrafine fibers. (a1)-(c1):TEM images of PAN/PVP Janus ultrafine fibers.

#### 2. Elemental analysis

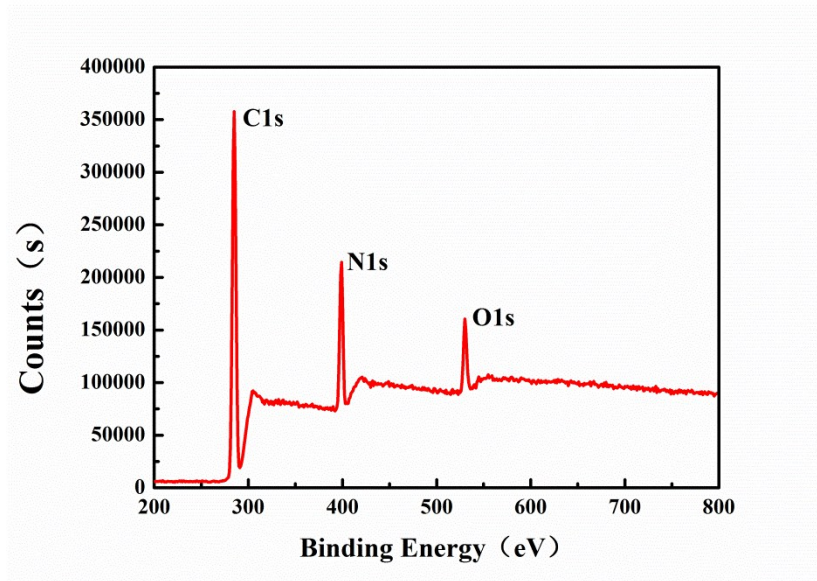

Fig. S2. XPS spectra of PAN/PVP composite UFM

Table1: The atomic content of UFM

| Element | Janus NFM | composite NFM | Janus NFM immersed into water for 1h |
|---------|-----------|---------------|--------------------------------------|
| C1s     | 77.29%    | 77.21%        | 76.98%                               |
| N1s     | 13.87%    | 17.06%        | 21.2%                                |
| O1s     | 8.84%     | 5.72%         | 1.82%                                |

### 3. Drug release

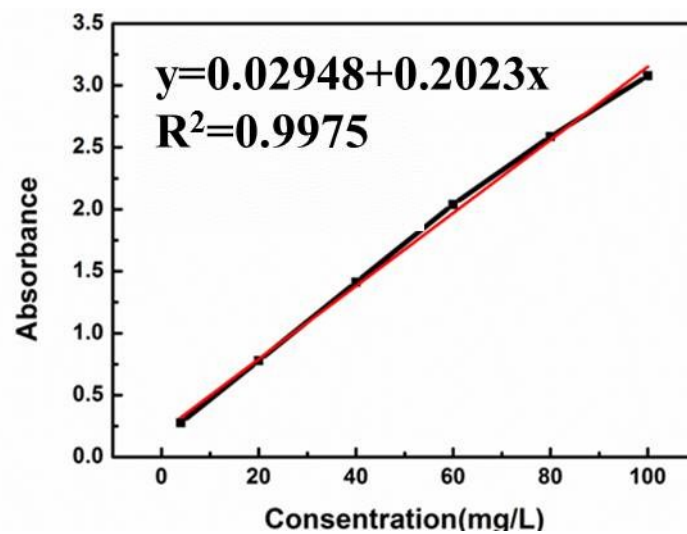

Fig. S3. Calibration curve of dexamethasone:  $y=0.02948+0.2023x$

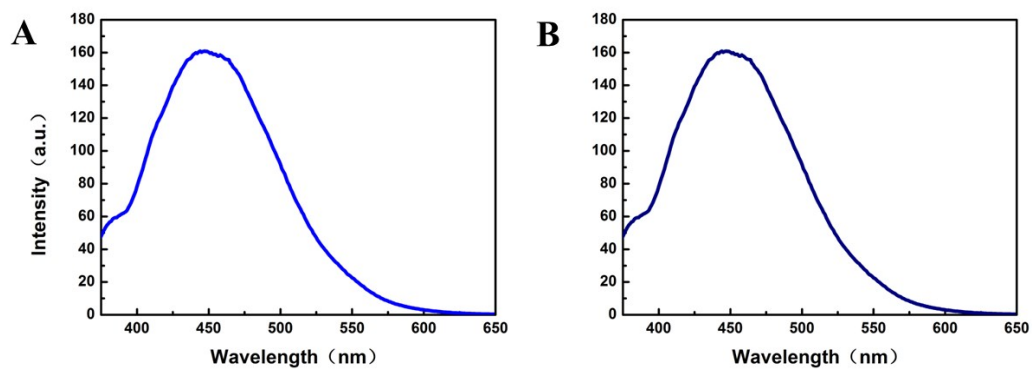

**Fig. S4.** PL spectra of 1, 8-naphthalene anhydride/DMF solution(A) and 1, 8-naphthalene anhydride:

dexamethasone=1:1/DMF(B)

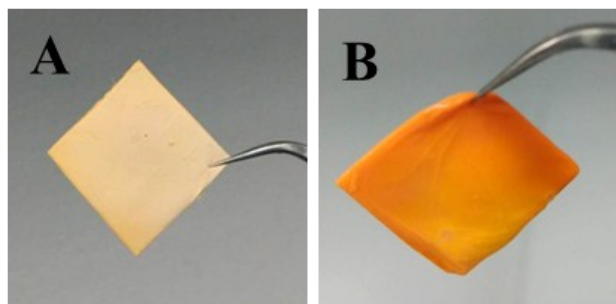

**Fig. S5.** Digital photos of Janus UFM before (A) and after (B) drug release.
